# Supplementary material for: σ-p Conjugated copolymers via dehydrocoupling polymerization of phenylsilane and mesitylborane
Source: Royal Society of Chemistry journal article supplement (doi:10.1039/c6py00205f), 2016-01-01
Supplement: c6py00205f1.pdf [file c6py00205f1.pdf]

## $\sigma$ -p Conjugated Copolymers via Dehydrocoupling Polymerization of Phenylsilane and Mesitylborane

Puhup Puneet<sup>a,b</sup>, Raman Vedarajan<sup>a</sup> and Noriyoshi Matsumi<sup>a,\*</sup>

The peaks at 3.2 and 4-5 ppm have been assigned to Si-H protons. In order to assign various kinds of Si-H protons in <sup>1</sup>H-NMR, a polymer mimic model structure was calculated (**Table S1**) and the <sup>1</sup>H-NMR spectrum was predicted (**Figure S1**) using DFT calculations (DFT, DMSO-solvation, B3LYP-6-311G (d,p), NMR-GIAO method, Gaussian 09). The model was decided considering random nature of the polymer sequence. The predicted <sup>1</sup>H-NMR spectrum of polymer mimic model (Table 1) was closely matching with the experimental spectra. The peaks at 3.17 and 4.01-4.60 were also present in the experimental spectrum.

**Table S1:** Chemical Structure, Optimized Structure and Chemical Shift Values Predicted by DFT Calculations.

| S. No. | Chemical Structure                                                                | Optimized Structure                                                                 | <sup>1</sup> H-NMR Signals /ppm Due to Si-H                |
|--------|-----------------------------------------------------------------------------------|-------------------------------------------------------------------------------------|------------------------------------------------------------|
| 1      | 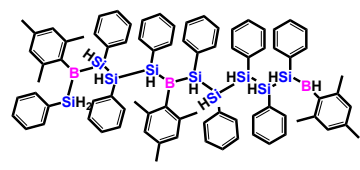 |  | 3.17, 4.05, 4.07, 4.10, 4.19, 4.30, 4.40, 4.60, 4.92, 5.26 |

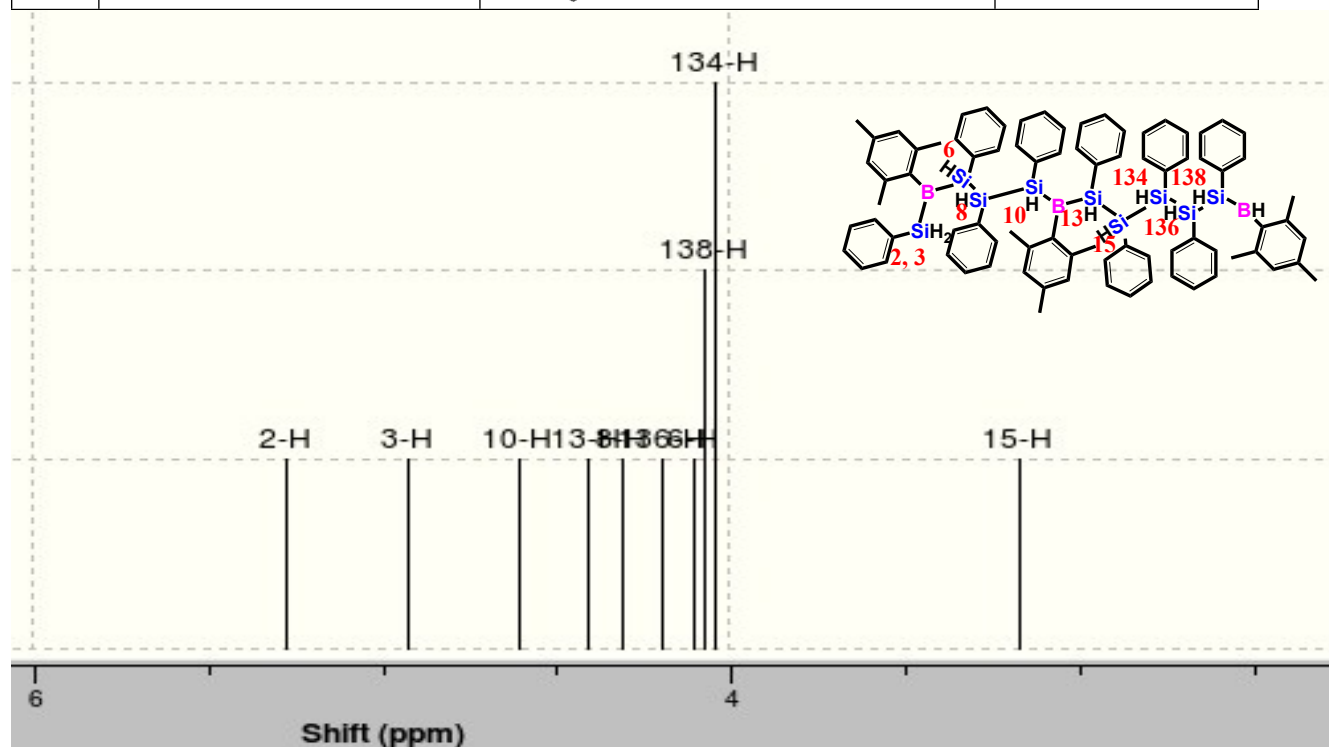

**Figure S1:** Predicted <sup>1</sup>H-NMR spectrum of polymer mimic model (Table S1). (Labelling is according to Gaussian 09).
